# Supplementary material
Source: PubMed Central journal article supplement (PMC3397268)
Supplement: mmc1.pdf [file mmc1.pdf]

The American Journal of Human Genetics, Volume 91

## **Supplemental Data**

### **Familial Pityriasis Rubra Pilaris Is**

### **Caused by Mutations in *CARD14***

**Dana Fuchs-Telem, Ofer Sarig, Maurice A.M. van Steensel,, Ofer Isakov Shirli Israeli, Janna Nousbeck, Katharina Richard, Veronique Winnepenninckx, Marigje Vernooij, Noam Shomron, Jouni Uitto, Philip Fleckman, Gabriele Richard, and Eli Sprecher**

### Family A

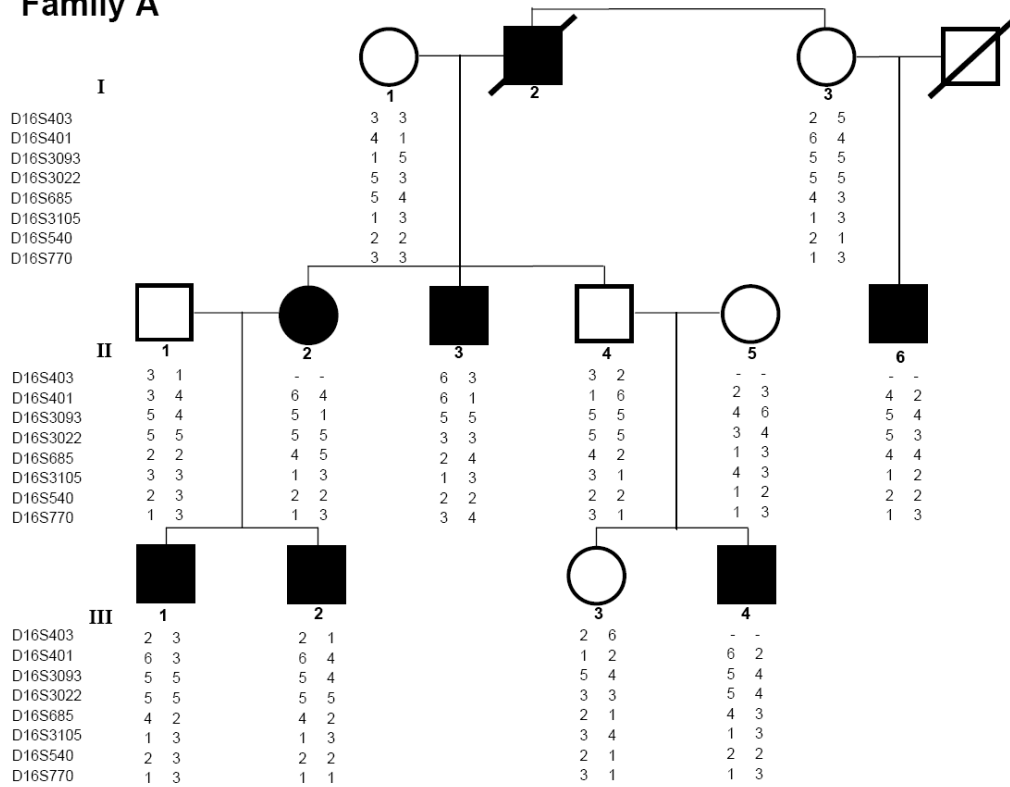

### Family B

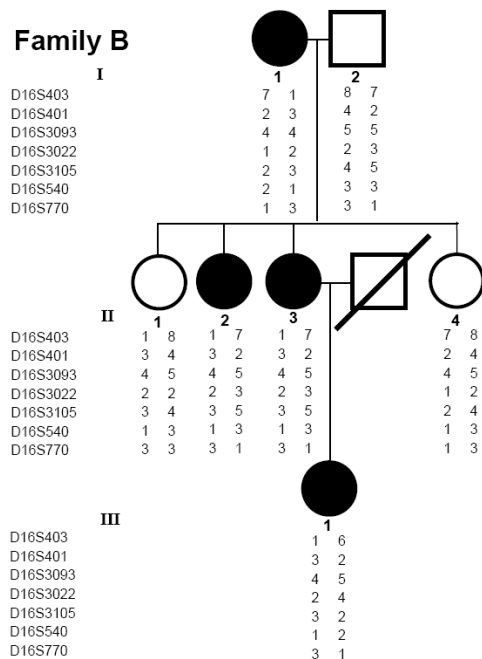

### Family C

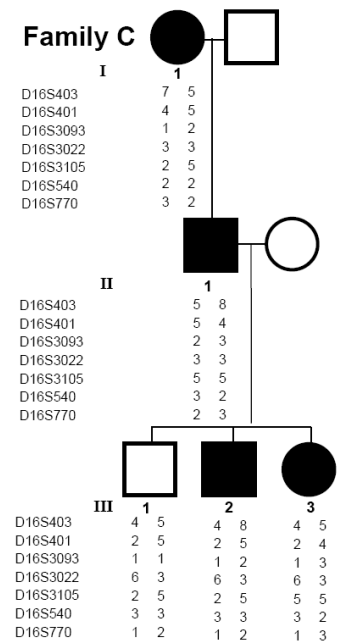

Figure S1. Haplotype Analysis on Chromosome 16

Haplotype analysis with polymorphic markers across the centromeric region of chromosome 16.

Table S1. Exome and Targeted-Capture Next-Generation Sequencing

| Sample* | Platform                     | Total Reads | No. Aligned Reads | % Aligned | % Mapped to Targets | Average Coverage of the Targets | % Targets Covered at Least 10x |
|---------|------------------------------|-------------|-------------------|-----------|---------------------|---------------------------------|--------------------------------|
| III4    | Illumina Genome Analyzer IIx | 16848189    | 10163867          | 60.3      | 7.2                 | 8.7                             | 25.5                           |
| II2     | Illumina Genome Analyzer IIx | 11595716    | 6216881           | 53.6      | 5.6                 | 4.7                             | 11.4                           |
| II4     | Illumina Genome Analyzer IIx | 15550166    | 8209894           | 52.8      | 3.5                 | 3.9                             | 9.7                            |
| II5     | Illumina Genome Analyzer IIx | 10020725    | 5876735           | 58.6      | 5.4                 | 3.9                             | 9.7                            |
| III4    | SOLiD 3.5                    | 84143687    | 63836967          | 75.9      | 55.7                | 41.1                            | 82.6                           |
| II2     | HiSeq2000                    | 53635584    | 42157569          | 78.6      | 77.6                | 50.2                            | 94.0                           |

\* Targeted next generation sequencing was performed using DNAs from 4 members of Family A. Aligned reads are those that map to the hg19 reference genome while reads mapped to target are those aligned to the targeting "baits" according to the capture method
